# Supplementary material
Source: Springer Nature journal article supplement (https://www.springermedizin.de/resource/supplementary/12885_2014_4862_MOESM2_ESM.pdf/9467564)
Supplement: MOESM2 [file 9467564]

Kinase inhibitor focused  
compound library

Compound alone  
Compound + 0.1 $\mu$ M Paclitaxel  
Compound + 0.5 $\mu$ M Doxorubicin

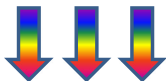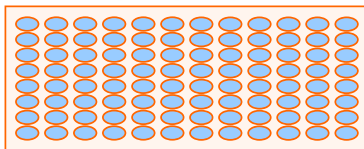

U-2OS<sub>MR</sub> or KHOSR<sub>2</sub>

Compound alone

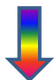

Compound + drug

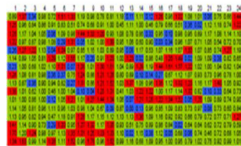

VS

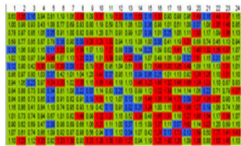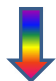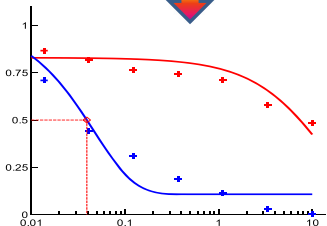

18 compounds were picked up  
for further validation
